# Supplementary material for: Rational design of surface termination of Ti3C2T2 MXenes for lithium-ion battery anodes
Source: Royal Society of Chemistry journal article supplement (doi:10.1039/d4cp04583a), 2025-01-01
Supplement: d4cp04583a1.pdf [file d4cp04583a1.pdf]

## Electronic Supplemental Information for

### Rational design of surface termination of $\text{Ti}_3\text{C}_2\text{T}_2$ MXenes for lithium-ion battery anodes

Meng Tian\*

School of New Energy, Nanjing University of Science and Technology, Jiangyin, Jiangsu 214443,  
China

\*Corresponding author: tianmeng@njust.edu.cn

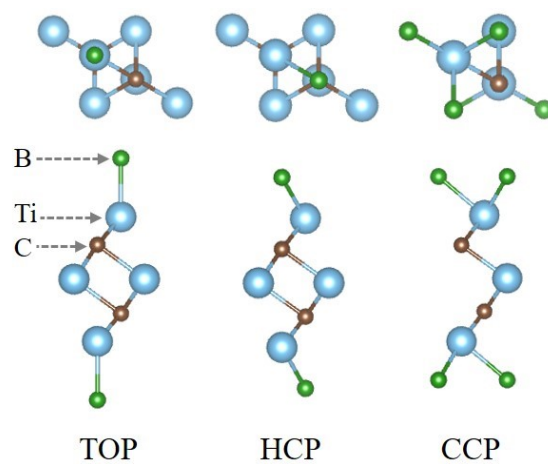

**Fig. S1.** Top and Side view of  $\text{Ti}_3\text{C}_2\text{B}_2$ .

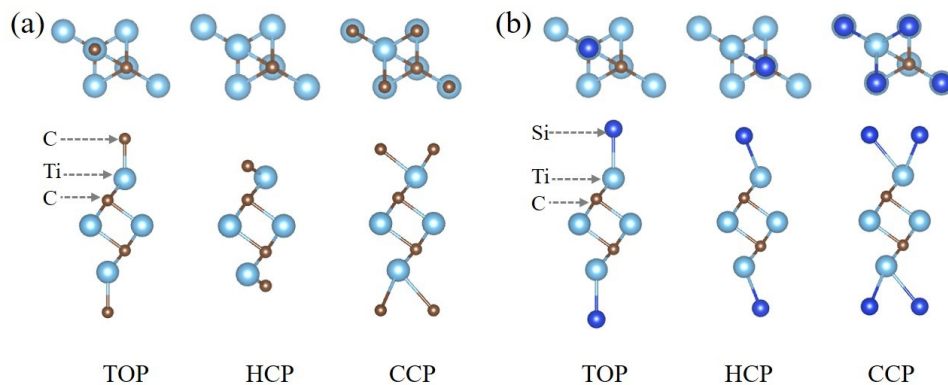

**Fig. S2.** Top and Side view of (a)  $\text{Ti}_3\text{C}_4$  and (b)  $\text{Ti}_3\text{C}_2\text{Si}_2$ .

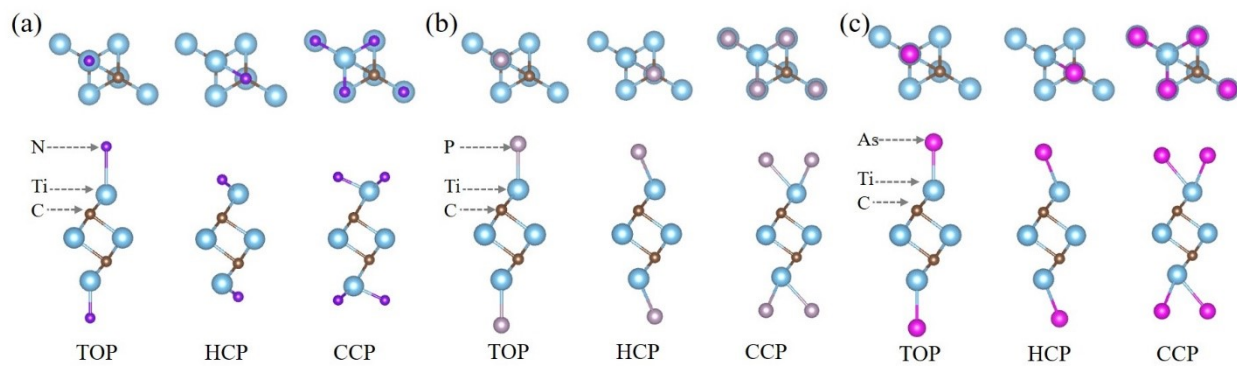

**Fig. S3.** Top and Side view of (a)  $\text{Ti}_3\text{C}_2\text{N}_2$ , (b)  $\text{Ti}_3\text{C}_2\text{P}_2$  and (c)  $\text{Ti}_3\text{C}_2\text{As}_2$ .

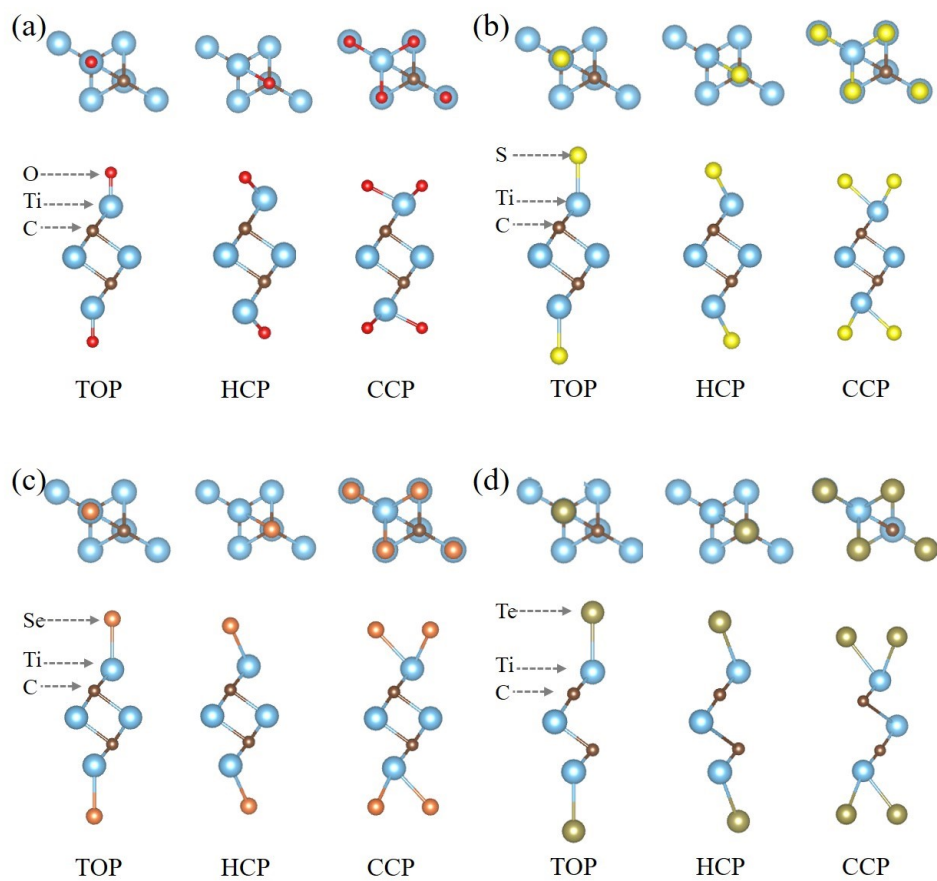

**Fig. S4.** Top and Side view of (a)  $\text{Ti}_3\text{C}_2\text{O}_2$ , (b)  $\text{Ti}_3\text{C}_2\text{S}_2$ , (c)  $\text{Ti}_3\text{C}_2\text{Se}_2$  and (d)  $\text{Ti}_3\text{C}_2\text{Te}_2$ .

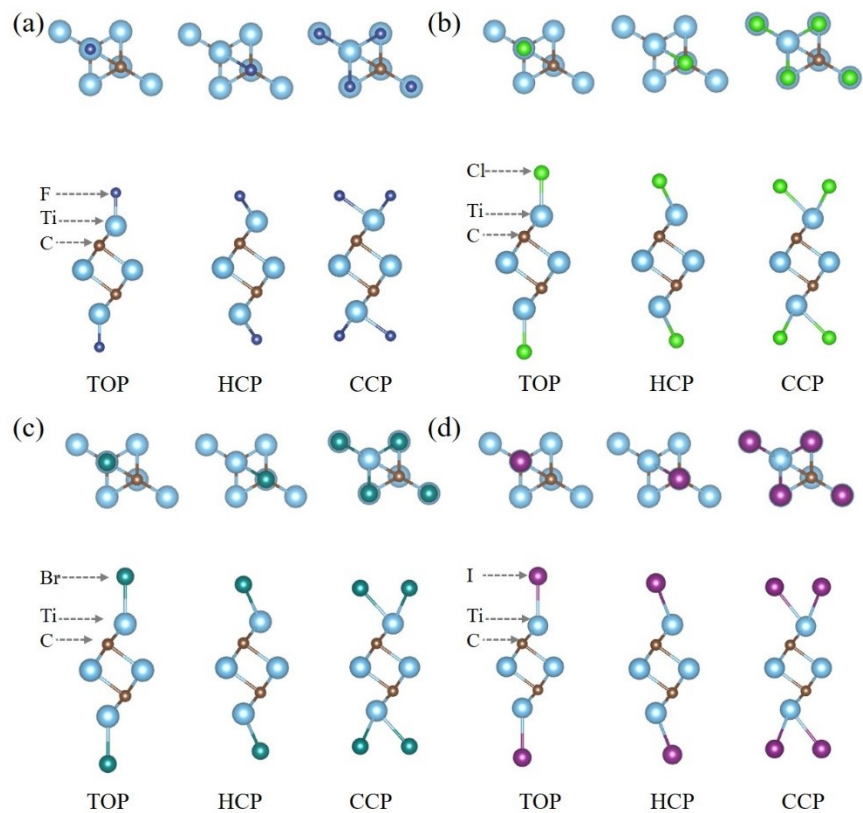

**Fig. S5.** Top and Side view of (a)  $\text{Ti}_3\text{C}_2\text{F}_2$ , (b)  $\text{Ti}_3\text{C}_2\text{Cl}_2$ , (c)  $\text{Ti}_3\text{C}_2\text{Br}_2$  and (d)  $\text{Ti}_3\text{C}_2\text{I}_2$ .

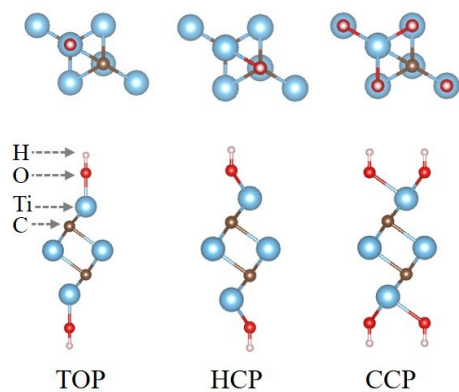

**Fig. S6.** Top and Side view of  $\text{Ti}_3\text{C}_2(\text{OH})_2$ .

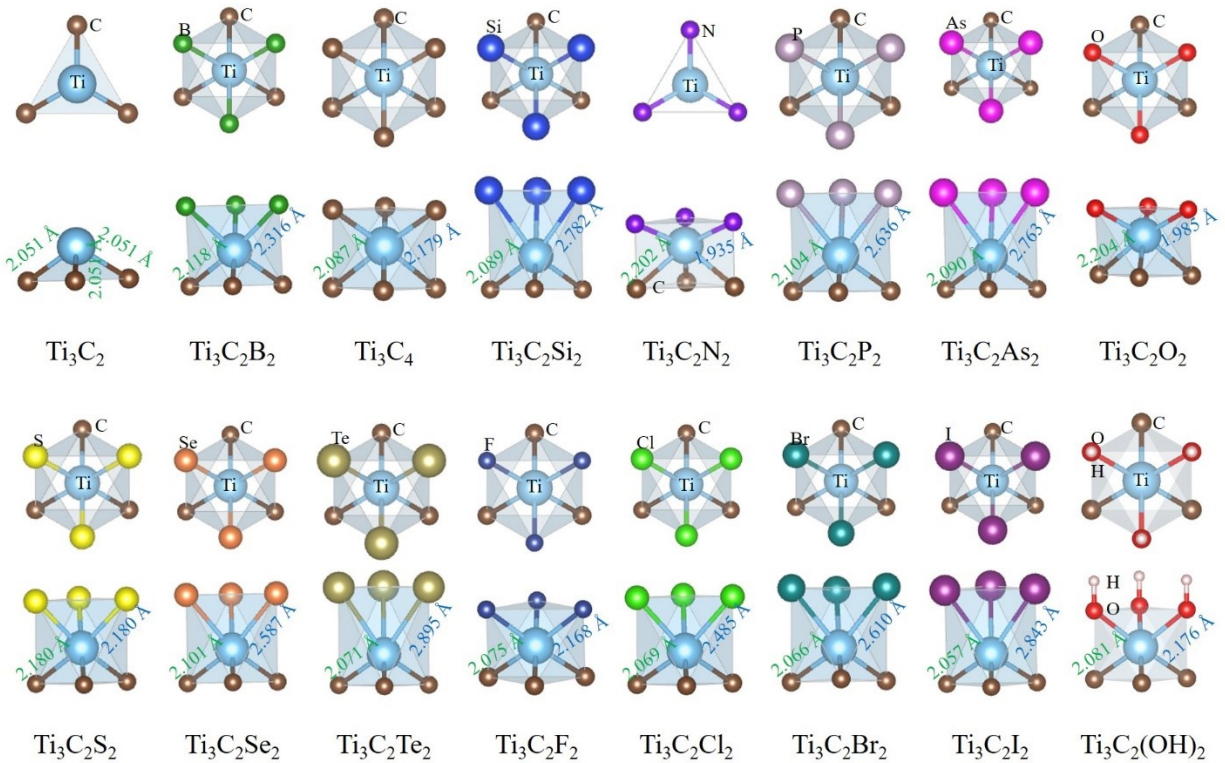

**Fig. S7.** The polyhedron structures, Ti-C and Ti-T bond length on the surface of  $\text{Ti}_3\text{C}_2\text{T}_2$  from top and side views.

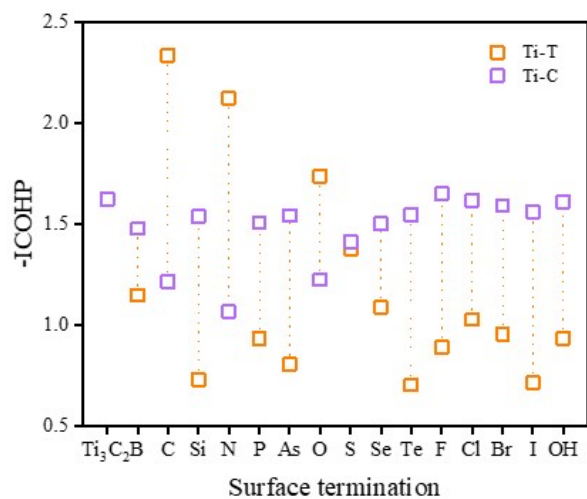

**Fig. S8.** The ICOHP of Ti-T bond and Ti-C bond in the surface polyhedron. ICOHP of Ti-T bond differs for different nonmetal and changes vary considerably. In contrast, ICOHP of Ti-C in the surface polyhedron remains small changes.

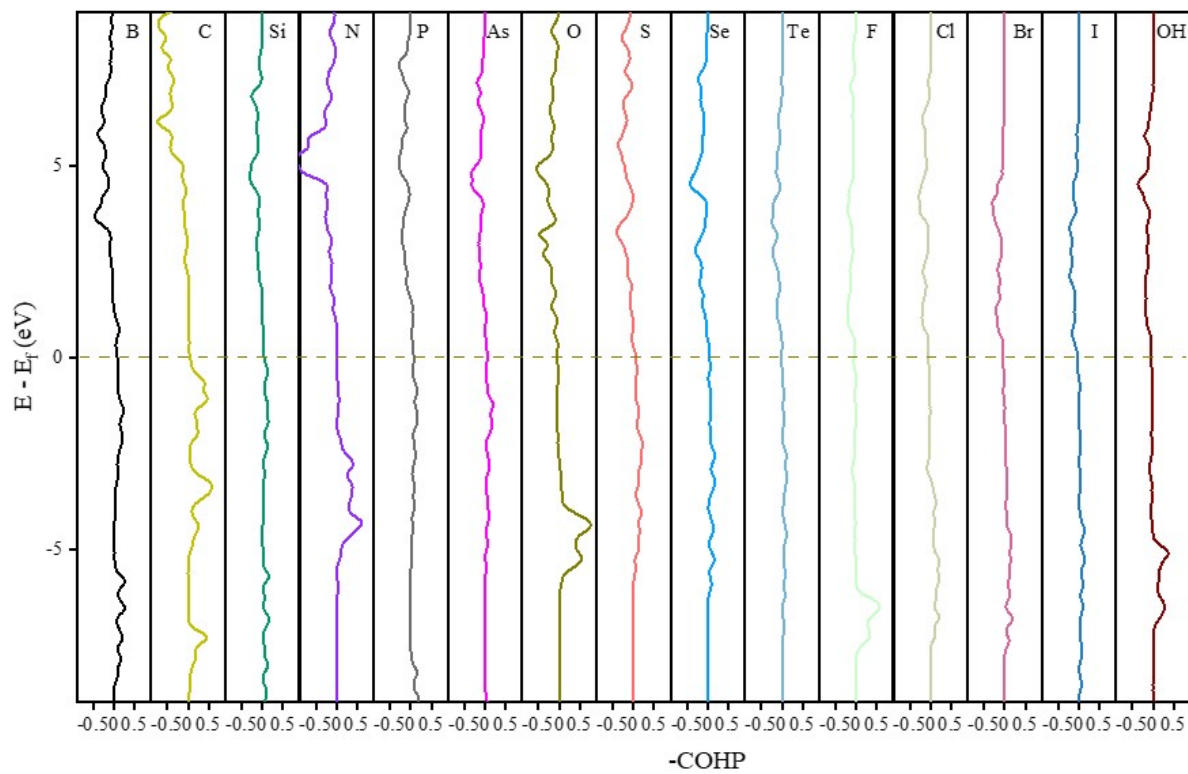

**Fig. S9.** COHP of Ti-T bond in the surface polyhedron.

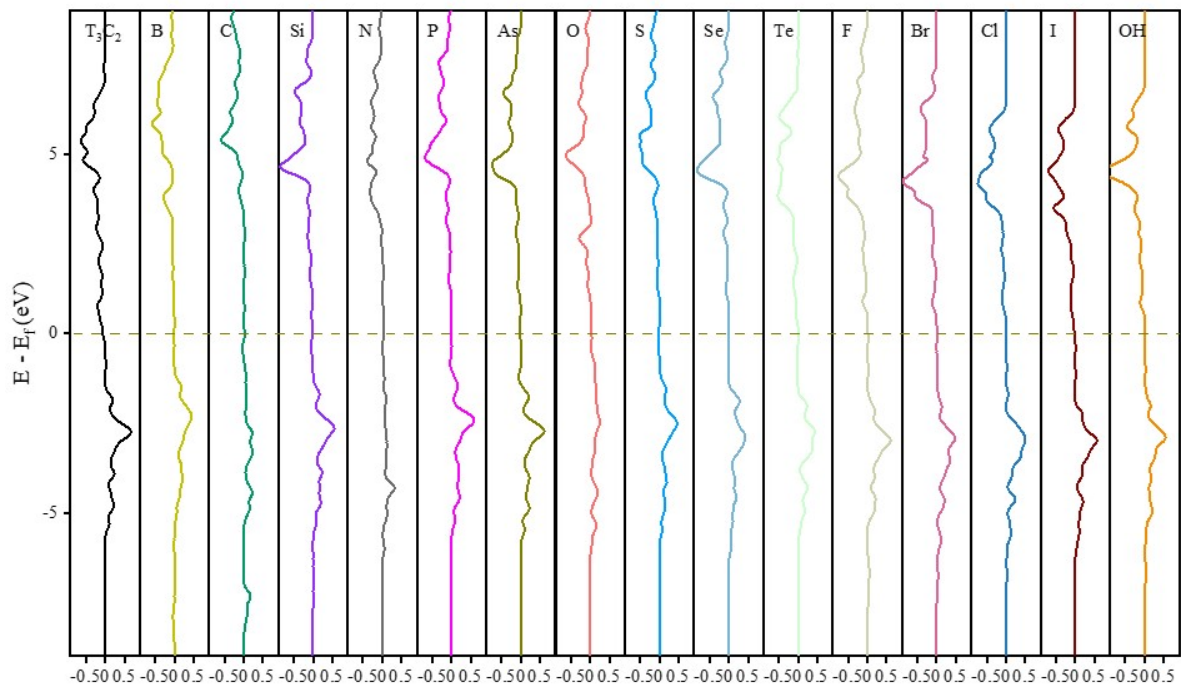

**Fig. S10.** COHP of Ti-C bond in the surface polyhedron.

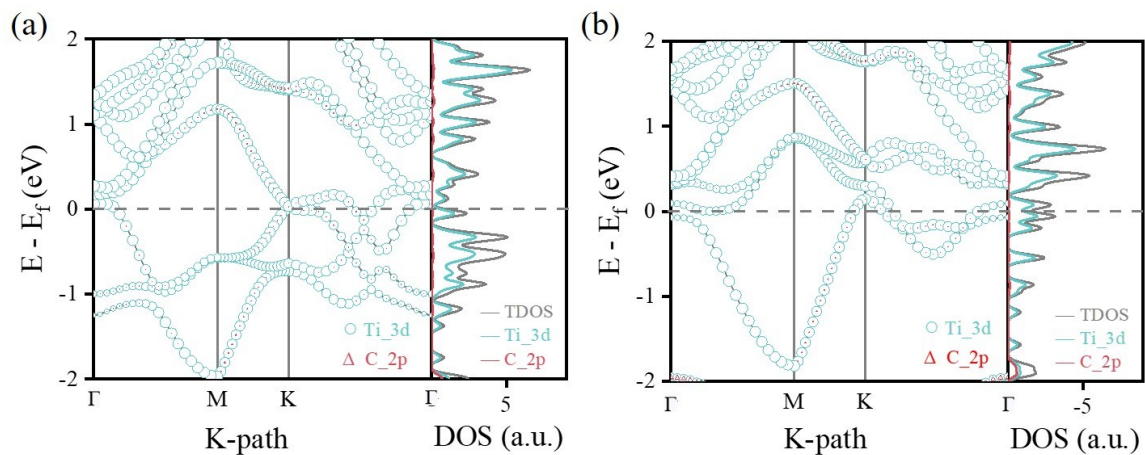

**Fig. S11.** (a) Spin-up and (b) spin-down electronic band structures and density of states (DOS) of  $\text{Ti}_3\text{C}_2$ .

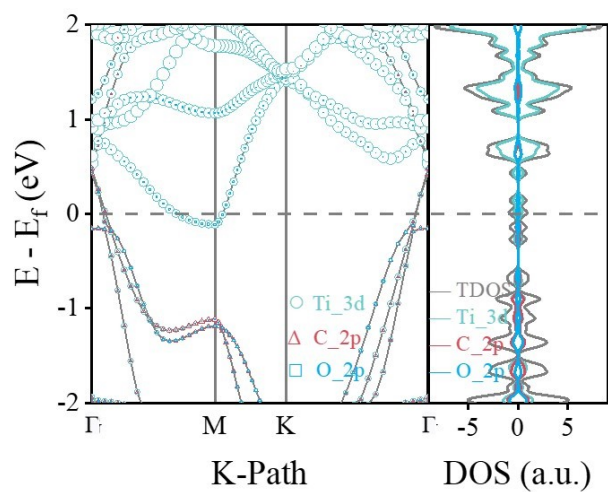

**Fig. S12.** Electronic band structure and DOS of  $\text{Ti}_3\text{C}_2\text{O}_2$ .

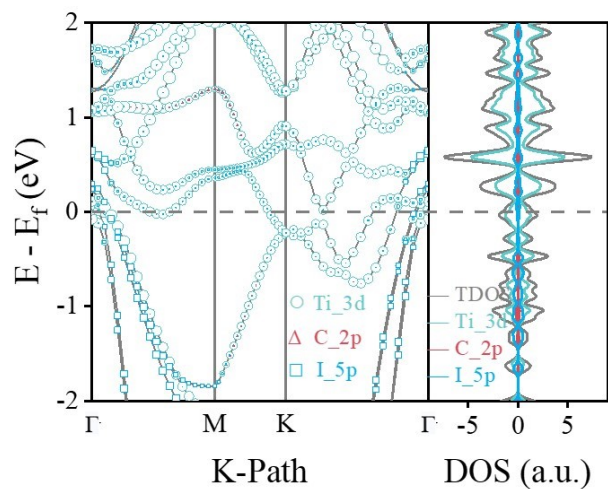

**Fig. S13.** Electronic band structure and DOS of  $\text{Ti}_3\text{C}_2\text{I}_2$ .

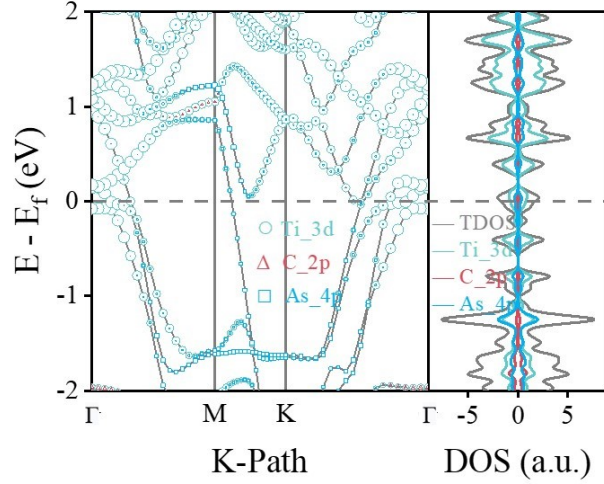

**Fig. S14.** Electronic band structure and DOS of  $\text{Ti}_3\text{C}_2\text{As}_2$ .

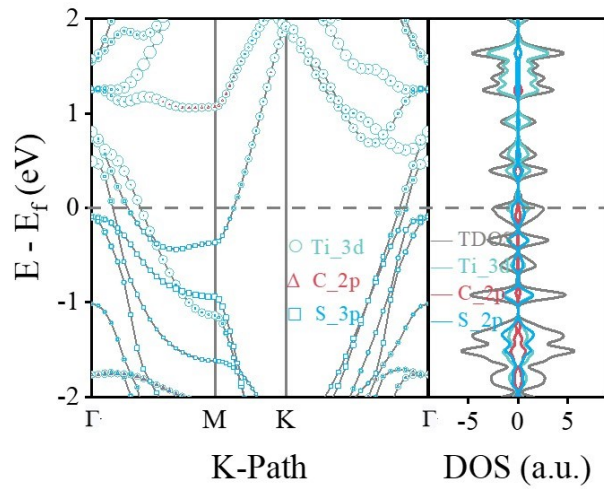

**Fig. S15.** Electronic band structure and DOS of  $\text{Ti}_3\text{C}_2\text{S}_2$ .

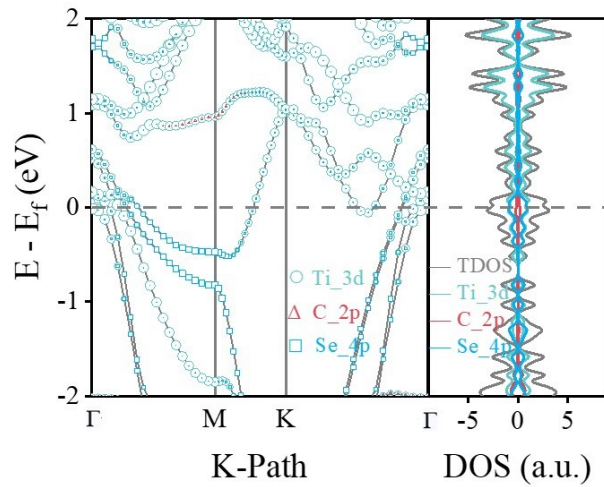

**Fig. S16.** Electronic band structure and DOS of  $\text{Ti}_3\text{C}_2\text{Se}_2$ .

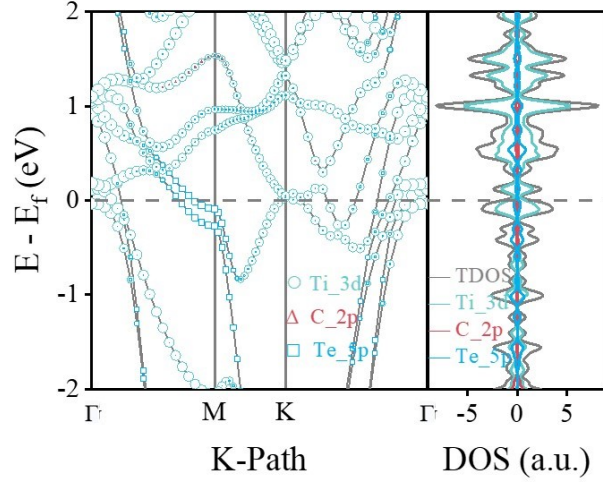

**Fig. S17.** Electronic band structure and DOS of  $\text{Ti}_3\text{C}_2\text{Te}_2$ .

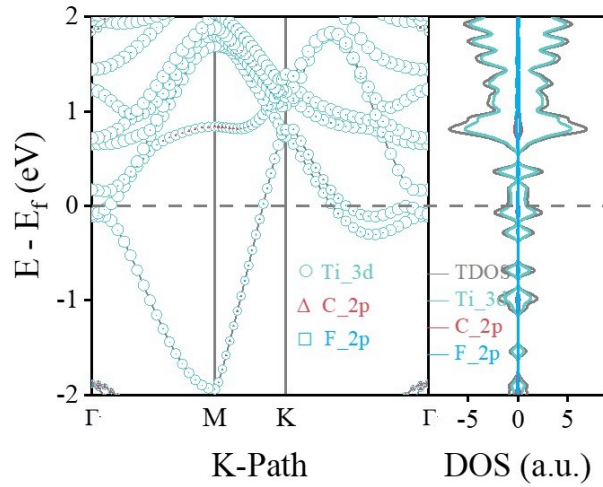

**Fig. S18.** Electronic band structure and DOS of  $\text{Ti}_3\text{C}_2\text{F}_2$ .

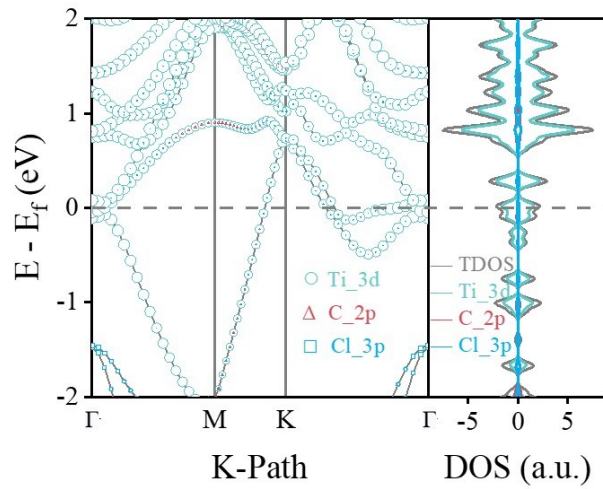

**Fig. S19.** Electronic band structure and DOS of  $\text{Ti}_3\text{C}_2\text{Cl}_2$ .



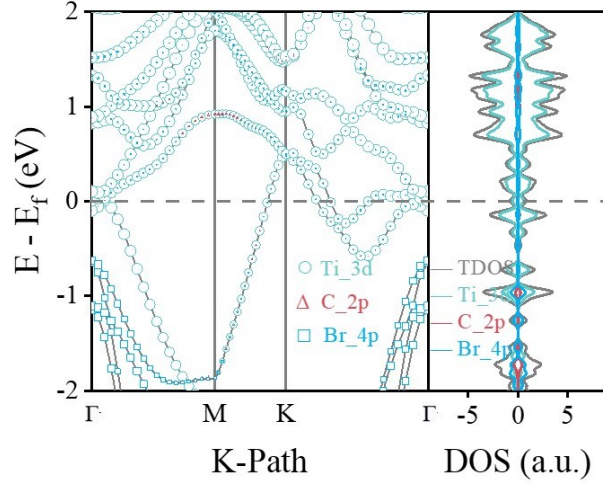

**Fig. S20.** Electronic band structure and DOS of  $\text{Ti}_3\text{C}_2\text{Br}_2$ .

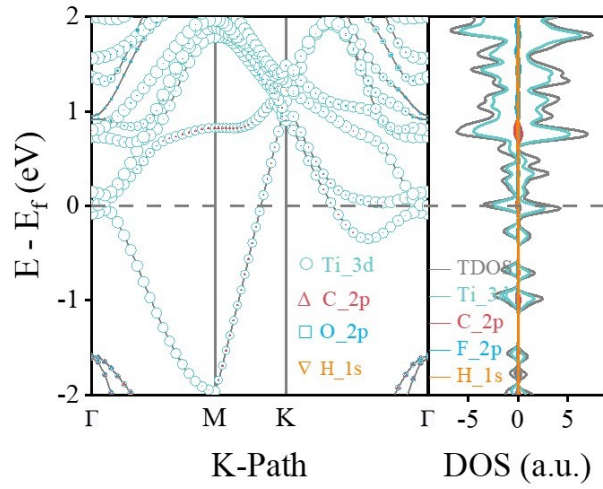

**Fig. S21.** Electronic band structure and DOS of  $\text{Ti}_3\text{C}_2(\text{OH})_2$ .

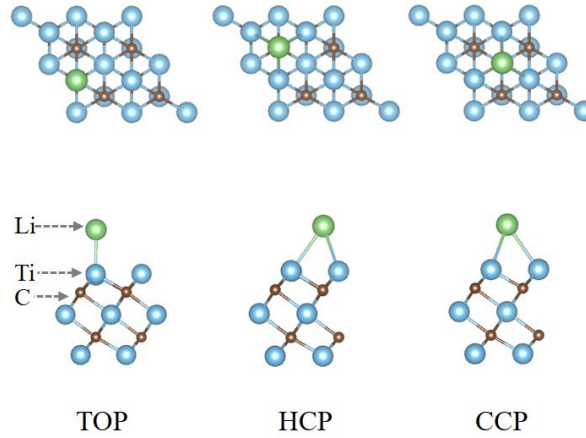

**Fig. S22.** Top and side views of Li-ion absorbed on  $\text{Ti}_3\text{C}_2$ .

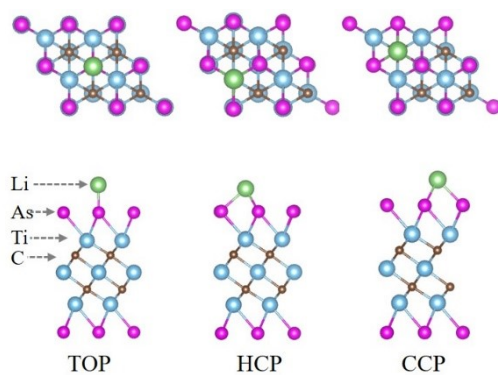

**Fig. S23.** Top and side views of Li-ion absorbed on  $\text{Ti}_3\text{C}_2\text{As}_2$ .

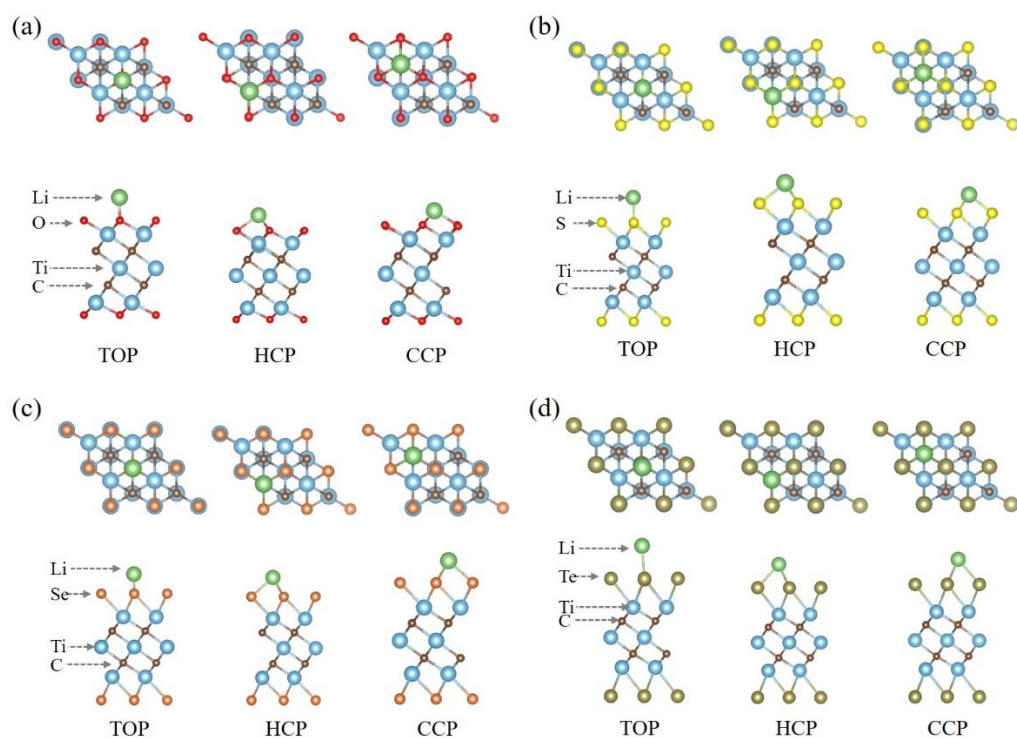

**Fig. S24.** Top and side views of Li-ion absorbed on  $\text{Ti}_3\text{C}_2\text{O}_2$ ,  $\text{Ti}_3\text{C}_2\text{S}_2$ ,  $\text{Ti}_3\text{C}_2\text{Se}_2$  and  $\text{Ti}_3\text{C}_2\text{Te}_2$ .

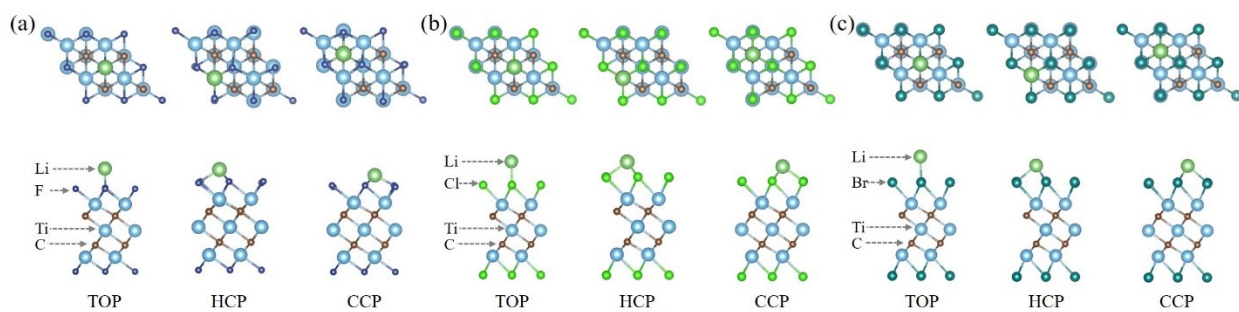

**Fig. S25.** Top and side views of Li-ion absorbed on  $\text{Ti}_3\text{C}_2\text{F}_2$ ,  $\text{Ti}_3\text{C}_2\text{Cl}_2$  and  $\text{Ti}_3\text{C}_2\text{Br}_2$ .

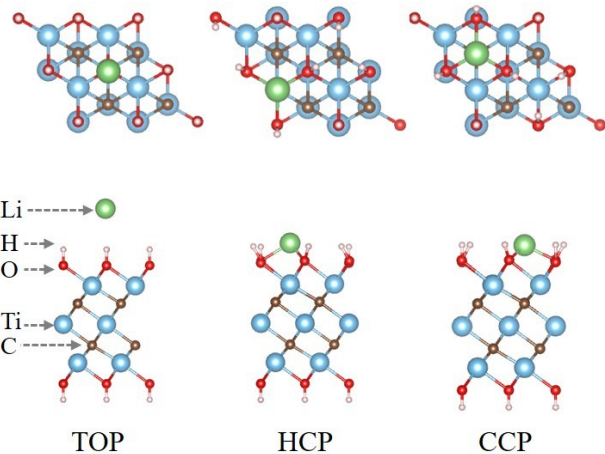

**Fig. S26.** Top and side views of Li-ion adsorbed on  $\text{Ti}_3\text{C}_2(\text{OH})_2$ .

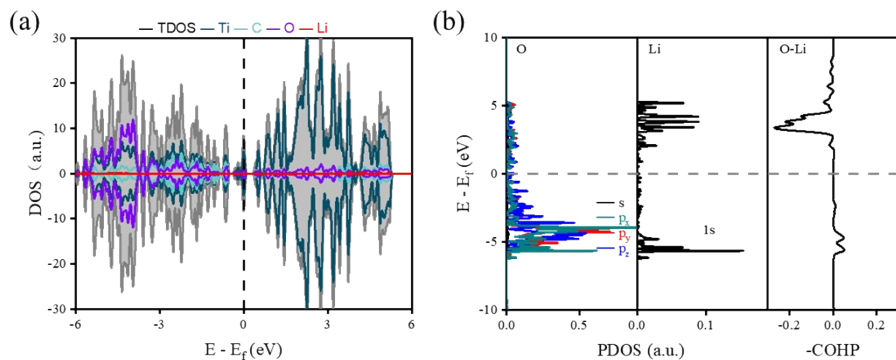

**Fig. S27.** (a) DOS of Li-ion adsorbed on  $\text{Ti}_3\text{C}_2\text{O}_2$ . (b) PDOS and COHP for O-Li bond.

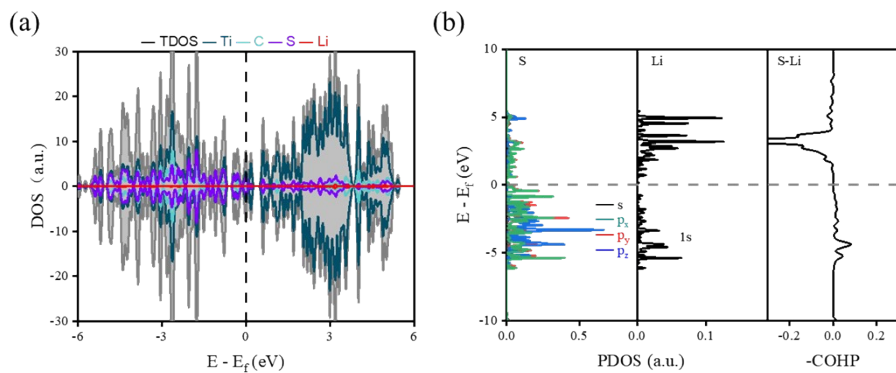

**Fig. S28.** (a) DOS of Li-ion adsorbed on  $\text{Ti}_3\text{C}_2\text{O}_2$ . (b) PDOS and COHP for S-Li bond.

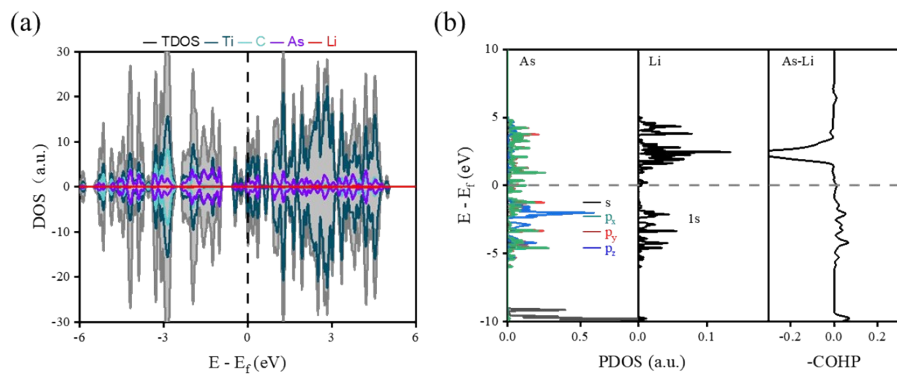

**Fig. S29.** (a) DOS of Li-ion absorbed on  $\text{Ti}_3\text{C}_2\text{As}_2$ . (b) PDOS and COHP for As-Li bond.

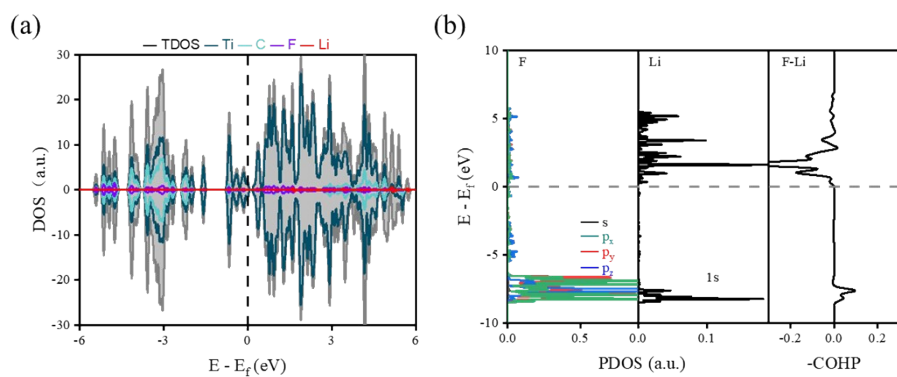

**Fig. S30.** (a) DOS of Li-ion absorbed on  $\text{Ti}_3\text{C}_2\text{F}_2$ . (b) PDOS and COHP for F-Li bond.

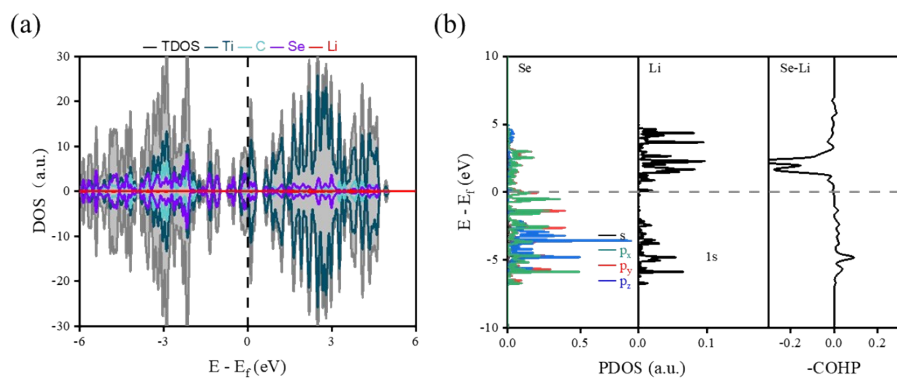

**Fig. S31.** (a) DOS of Li-ion absorbed on  $\text{Ti}_3\text{C}_2\text{Se}_2$ . (b) PDOS and COHP for Se-Li bond.

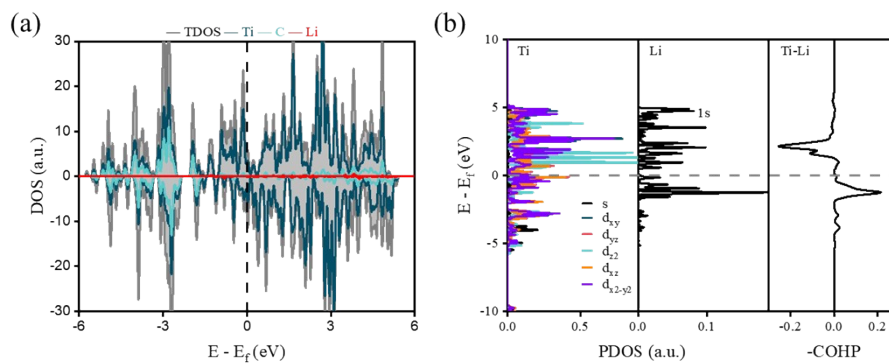

**Fig. S32.** (a) DOS of Li-ion absorbed on  $\text{Ti}_3\text{C}_2$ . (b) PDOS and COHP for Ti-Li bond.

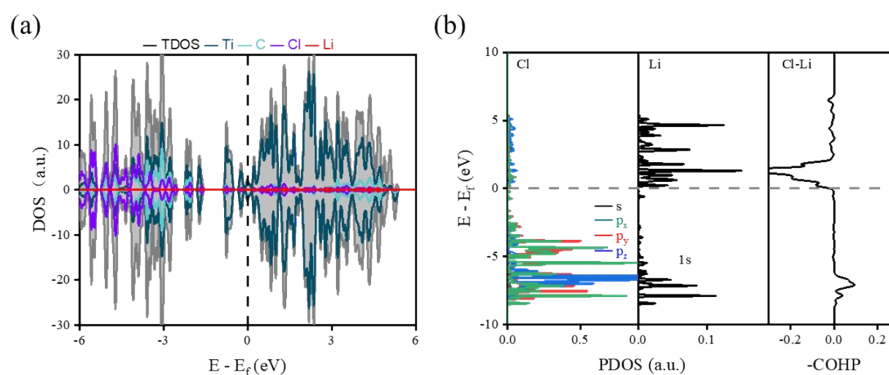

**Fig. S33.** (a) DOS of Li-ion absorbed on  $\text{Ti}_3\text{C}_2\text{Cl}_2$ . (b) PDOS and COHP for Cl-Li bond.

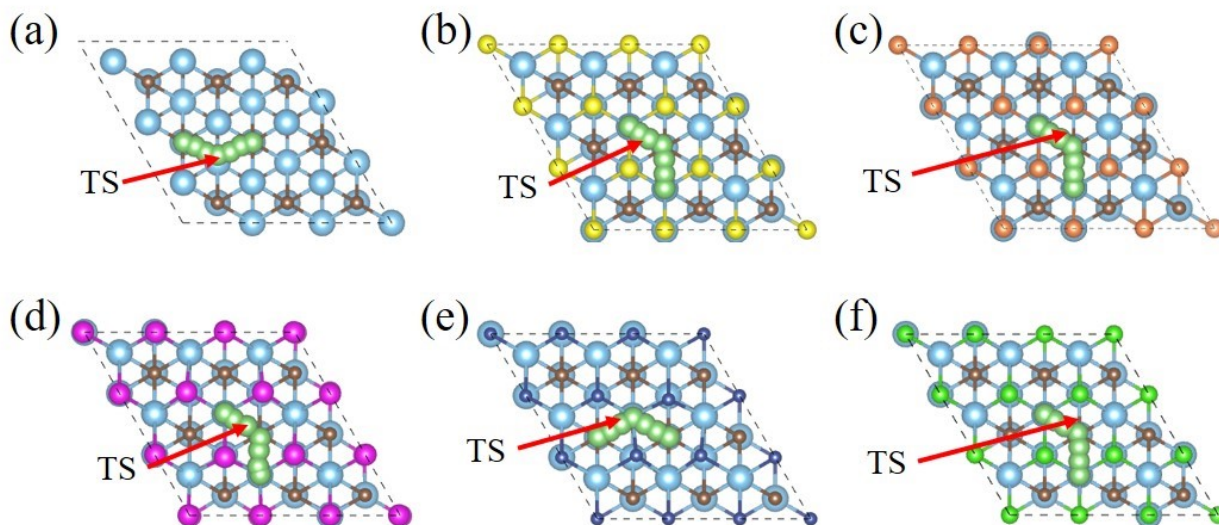

**Fig. S34.** Li-ion diffusion pathways for (a)  $\text{Ti}_3\text{C}_2$ , (b)  $\text{Ti}_3\text{C}_2\text{S}_2$ , (c)  $\text{Ti}_3\text{C}_2\text{Se}_2$ , (d)  $\text{Ti}_3\text{C}_2\text{As}_2$ , (e)  $\text{Ti}_3\text{C}_2\text{F}_2$ , and (f)  $\text{Ti}_3\text{C}_2\text{Cl}_2$ .

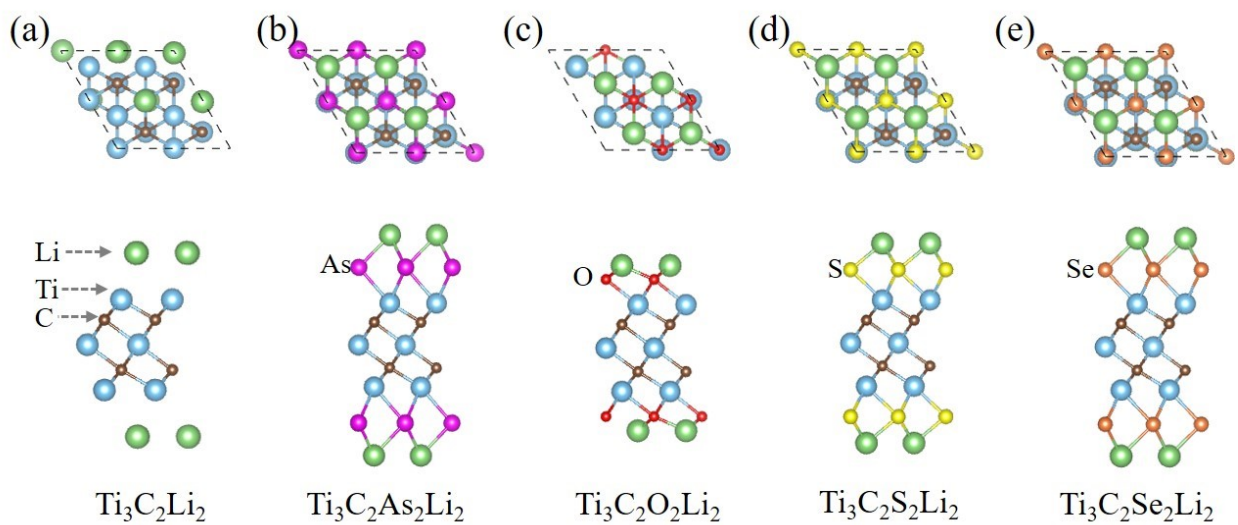

**Fig. S35.** One layer Li-ions adsorbed on (a)  $\text{Ti}_3\text{C}_2$ , (b)  $\text{Ti}_3\text{C}_2\text{As}_2$ , (c)  $\text{Ti}_3\text{C}_2\text{O}_2$ , (d)  $\text{Ti}_3\text{C}_2\text{S}_2$  and (e)  $\text{Ti}_3\text{C}_2\text{Se}_2$ .

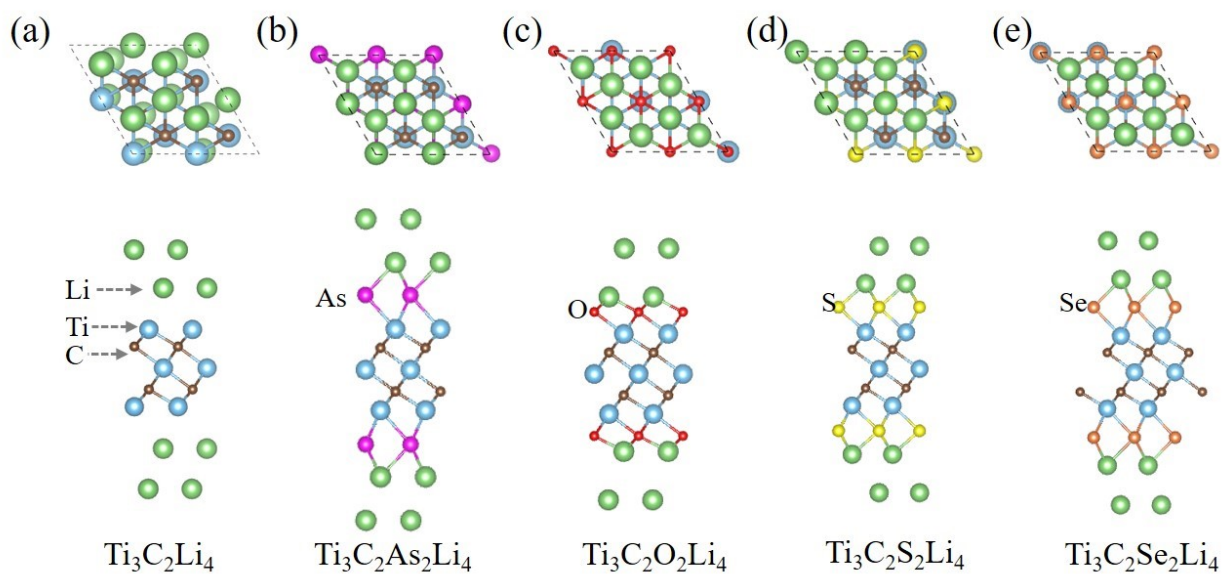

**Fig. S36.** Two layers Li-ions adsorbed on (a)  $\text{Ti}_3\text{C}_2$ , (b)  $\text{Ti}_3\text{C}_2\text{As}_2$ , (c)  $\text{Ti}_3\text{C}_2\text{O}_2$ , (d)  $\text{Ti}_3\text{C}_2\text{S}_2$  and (e)  $\text{Ti}_3\text{C}_2\text{Se}_2$ .

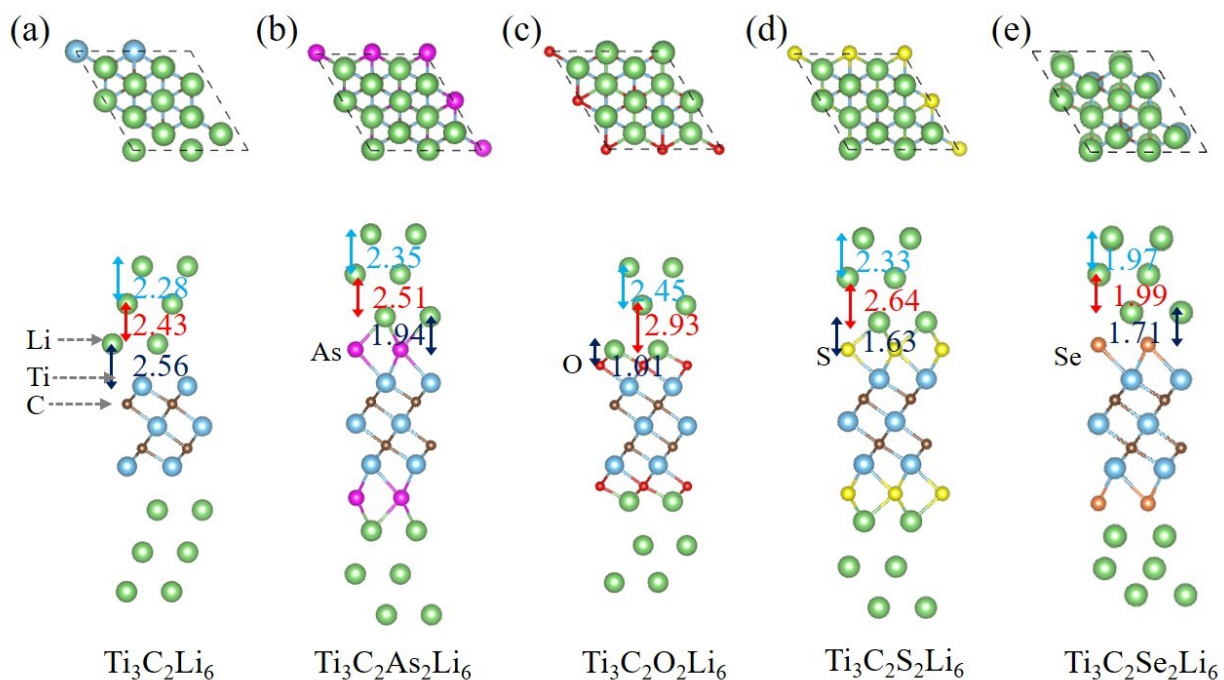

**Fig. S37.** Three layers Li-ions adsorbed on (a)  $\text{Ti}_3\text{C}_2$ , (b)  $\text{Ti}_3\text{C}_2\text{As}_2$ , (c)  $\text{Ti}_3\text{C}_2\text{O}_2$ , (d)  $\text{Ti}_3\text{C}_2\text{S}_2$ , (e)  $\text{Ti}_3\text{C}_2\text{Se}_2$ .

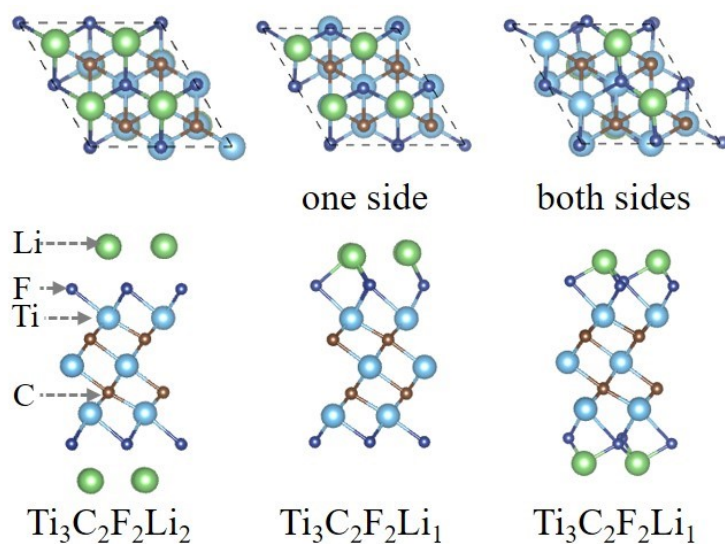

**Fig. S38.** Three different structure for Li-ions adsorbed on  $\text{Ti}_3\text{C}_2\text{F}_2$ . The structure of  $\text{Ti}_3\text{C}_2\text{F}_2\text{Li}$  with both sides Li-ions adsorption was adopted for the lower negative energy. The adsorption energy for  $\text{Ti}_3\text{C}_2\text{F}_2\text{Li}_2$  is positive (+0.67 eV).

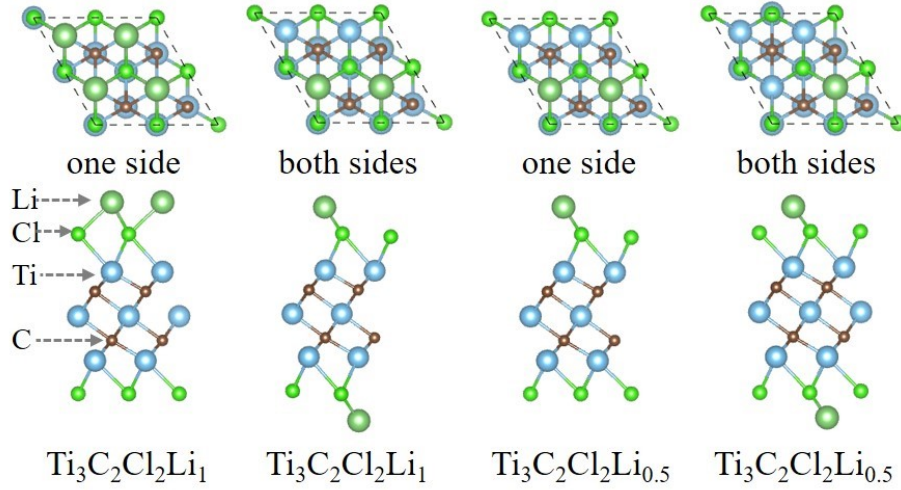

**Fig. S39.** Different structure for Li-ions adsorbed on  $\text{Ti}_3\text{C}_2\text{Cl}_2$ . The adsorption energy for  $\text{Ti}_3\text{C}_2\text{Cl}_2\text{Li}_{0.5}$  with both sides Li-ion adsorption is negative, while others are positive.

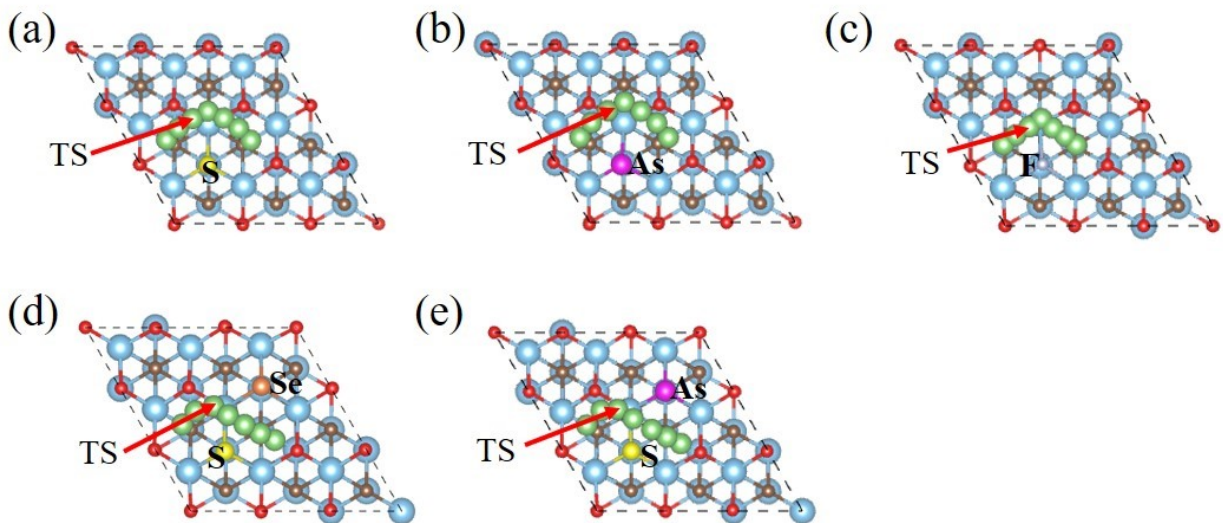

**Fig. S40.** Li-ion diffusion pathways on  $\text{Ti}_3\text{C}_2\text{O}_2$  with (a) S, (b) As, (c) F, (d) S and Se, (e) S and As doping.



**Table S1** The Ti-C and Ti-T (functional groups) bonds in the surface polyhedron.

|                                                  | Ti-T (T = functional nonmetal) bond (Å) in the surface polyhedron |         |         |         |         |         | Average bond length Å | Distortion index |
|--------------------------------------------------|-------------------------------------------------------------------|---------|---------|---------|---------|---------|-----------------------|------------------|
|                                                  | Ti-C1                                                             | Ti-C2   | Ti-C3   | Ti-T1   | Ti-T2   | Ti-T3   |                       |                  |
| Ti <sub>3</sub> C <sub>2</sub>                   | 2.05148                                                           | 2.05148 | 2.05148 | /       | /       | /       | 2.0515                | 0                |
| Ti <sub>3</sub> C <sub>2</sub> B <sub>2</sub>    | 2.1181                                                            | 2.11814 | 2.11819 | 2.31615 | 2.31631 | 2.31638 | 2.2172                | 0.04468          |
| Ti <sub>3</sub> C <sub>4</sub>                   | 2.08667                                                           | 2.08733 | 2.08753 | 2.17859 | 2.17941 | 2.17957 | 2.1332                | 0.02157          |
| Ti <sub>3</sub> C <sub>2</sub> Si <sub>2</sub>   | 2.08948                                                           | 2.08948 | 2.08948 | 2.78165 | 2.78165 | 2.78165 | 2.4356                | 0.1421           |
| Ti <sub>3</sub> C <sub>2</sub> N <sub>2</sub>    | 2.20199                                                           | 2.20199 | 2.20199 | 1.93477 | 1.93477 | 1.93477 | 2.0684                | 0.0646           |
| Ti <sub>3</sub> C <sub>2</sub> P <sub>2</sub>    | 2.10457                                                           | 2.10457 | 2.10457 | 2.63611 | 2.63611 | 2.63611 | 2.3703                | 0.11212          |
| Ti <sub>3</sub> C <sub>2</sub> As <sub>2</sub>   | 2.09048                                                           | 2.09048 | 2.09048 | 2.76246 | 2.76246 | 2.76246 | 2.4265                | 0.13847          |
| Ti <sub>3</sub> C <sub>2</sub> O <sub>2</sub>    | 2.20465                                                           | 2.20465 | 2.20465 | 1.98483 | 1.98483 | 1.98483 | 2.0947                | 0.05247          |
| Ti <sub>3</sub> C <sub>2</sub> S <sub>2</sub>    | 2.18003                                                           | 2.18003 | 2.18003 | 2.18052 | 2.18052 | 2.18052 | 2.1803                | 0.00011          |
| Ti <sub>3</sub> C <sub>2</sub> Se <sub>2</sub>   | 2.10137                                                           | 2.10137 | 2.10137 | 2.58689 | 2.58689 | 2.58689 | 2.3441                | 0.10356          |
| Ti <sub>3</sub> C <sub>2</sub> Te <sub>2</sub>   | 2.07137                                                           | 2.07137 | 2.07137 | 2.89463 | 2.89463 | 2.89463 | 2.4832                | 0.16583          |
| Ti <sub>3</sub> C <sub>2</sub> F <sub>2</sub>    | 2.07504                                                           | 2.07504 | 2.07504 | 2.16819 | 2.16819 | 2.16825 | 2.1216                | 0.02195          |
| Ti <sub>3</sub> C <sub>2</sub> Cl <sub>2</sub>   | 2.06852                                                           | 2.06852 | 2.06852 | 2.48521 | 2.48521 | 2.48521 | 2.2769                | 0.09151          |
| Ti <sub>3</sub> C <sub>2</sub> Br <sub>2</sub>   | 2.06635                                                           | 2.06635 | 2.06635 | 2.6102  | 2.6102  | 2.6102  | 2.3383                | 0.11629          |
| Ti <sub>3</sub> C <sub>2</sub> I <sub>2</sub>    | 2.05699                                                           | 2.05699 | 2.05699 | 2.84263 | 2.84263 | 2.84263 | 2.4498                | 0.16035          |
| Ti <sub>3</sub> C <sub>2</sub> (OH) <sub>2</sub> | 2.08064                                                           | 2.08066 | 2.08066 | 2.17577 | 2.17577 | 2.17582 | 2.1282                | 0.02235          |

**Table S2.** The specific capacity for S, Se, F, Cl, S-Se and S-As doped Ti<sub>3</sub>C<sub>2</sub>O<sub>2</sub>.

| doping element | Specific capacity (mAh/g) |            |              |
|----------------|---------------------------|------------|--------------|
|                | one layer                 | two layers | three layers |
| Without        | 268.50                    | 537.01     | 805.51       |
| S              | 267.31                    | 534.62     | 801.92       |
| Se             | 263.88                    | 527.76     | 791.64       |
| As             | 264.17                    | 528.34     | 792.51       |
| F              | 268.28                    | 536.56     | 804.84       |
| S-Se           | 262.72                    | 525.45     | 788.17       |
| S-As           | 263.01                    | 526.03     | 789.04       |
